# Supplementary material
Source: PubMed Central journal article supplement (PMC8298284)
Supplement: NIHMS1711501-supplement-Supplemental_Digital_Content_to_Be_Published__cited_in_text_.pdf [file NIHMS1711501-supplement-Supplemental_Digital_Content_to_Be_Published__cited_in_text_.pdf]

**Supplemental Table S1.** Demographic, clinical characteristics of mRNA vaccinees compared to that of Janssen vaccinees.

|                                                        | mRNA<br>(n=725) | Janssen<br>(n=12) | p-value           |
|--------------------------------------------------------|-----------------|-------------------|-------------------|
| Age, median years (IQR)                                | 63 (48-69)      | 56 (42-60)        | 0.06 <sup>1</sup> |
| Sex, no. (%) <sup>2</sup>                              |                 |                   |                   |
| Female                                                 | 404 (57)        | 7 (58)            | 0.99 <sup>3</sup> |
| Male                                                   | 307 (43)        | 5 (42)            |                   |
| Race, no (%) <sup>4</sup>                              |                 |                   |                   |
| Non-white                                              | 73 (10)         | 2 (17)            | 0.36 <sup>3</sup> |
| White                                                  | 639 (90)        | 10 (83)           |                   |
| Organ, no. (%) <sup>3</sup>                            |                 |                   |                   |
| Kidney                                                 | 330 (46)        | 7 (58)            | 0.98 <sup>3</sup> |
| Liver                                                  | 160 (22)        | 3 (25)            |                   |
| Heart                                                  | 100 (14)        | 1 (8)             |                   |
| Lung                                                   | 94 (13)         | 1 (8)             |                   |
| Other                                                  | 32 (5)          | 0 (0)             |                   |
| Time since transplant, median years (IQR) <sup>4</sup> | 6 (3-14)        | 9 (3-15)          | 0.79 <sup>1</sup> |
| Maintenance immunosuppression regimen, no. (%)         |                 |                   |                   |
| Includes anti-metabolite                               | 501 (69)        | 10 (83)           | 0.36 <sup>3</sup> |
| Does not include anti-metabolite                       | 224 (31)        | 2 (17)            |                   |
| Vaccine, no. (%) <sup>5</sup>                          |                 |                   |                   |
| mRNA-1273 (Moderna)                                    | 346 (48)        | -                 | -                 |
| BNT162b2 (Pfizer-BioNTech)                             | 369 (52)        | -                 |                   |

<sup>1</sup> Rank-sum p-value

<sup>2</sup> Missing in 14 (mRNA)

<sup>3</sup> Fisher's exact p-value

<sup>4</sup> Missing in 13 (mRNA)

<sup>3</sup> Missing in 9 (mRNA)

<sup>4</sup> Missing in 9 (mRNA)

<sup>5</sup> Missing in 10 (mRNA)

**Supplemental Table S2.** Demographic, clinical characteristics, and anti-RBD immunoglobulin levels among solid organ transplant recipients who underwent Janssen vaccine.

| Age | Sex    | Race  | Organ transplant | Years since transplant | Maintenance immunosuppression                 | Anti-RBD Ig (U/mL) |
|-----|--------|-------|------------------|------------------------|-----------------------------------------------|--------------------|
| 40  | Female | White | Kidney           | 8.9                    | Rapamycin<br>Azathioprine                     | <0.4               |
| 37  | Female | White | Kidney           | 8.2                    | Corticosteroid<br>Tacrolimus<br>Mycophenolate | <0.4               |
| 55  | Male   | White | Kidney           | 0.5                    | Corticosteroid<br>Tacrolimus<br>Mycophenolate | <0.4               |
| 58  | Male   | White | Kidney           | 15.8                   | Corticosteroid<br>Mycophenolate               | <0.4               |
| 58  | Male   | White | Liver            | 15.0                   | Tacrolimus<br>Mycophenolate                   | <0.4               |
| 62  | Male   | White | Kidney           | 14.5                   | Corticosteroid<br>Tacrolimus<br>Mycophenolate | <0.4               |
| 42  | Female | White | Liver            | 0.4                    | Corticosteroid<br>Tacrolimus<br>Mycophenolate | <0.4               |
| 69  | Female | White | Heart            | 5.4                    | Corticosteroid<br>Tacrolimus<br>Everolimus    | <0.4               |

|    |        |                                 |        |      |                                               |      |
|----|--------|---------------------------------|--------|------|-----------------------------------------------|------|
| 45 | Female | White                           | Lung   | 7.5  | Corticosteroid<br>Tacrolimus<br>Mycophenolate | <0.4 |
| 58 | Male   | White                           | Kidney | 15.1 | Tacrolimus<br>Mycophenolate                   | <0.4 |
| 65 | Female | Black or<br>African<br>American | Liver  | 1.0  | Tacrolimus                                    | 1.33 |
| 42 | Female | Prefer not<br>to answer         | Kidney | 13.5 | Tacrolimus<br>Azathioprine                    | 3.45 |

Abbreviations: RBD, receptor-binding domain; Ig, immunoglobulin; U/mL, units per milliliter
